# Supplementary material for: Immobilization of palladium catalyst on magnetically separable polyurea nanosupport
Source: Royal Society of Chemistry journal article supplement (doi:10.1039/c4ra08864f), 2014-01-01
Supplement: c4ra08864f1.pdf [file c4ra08864f1.pdf]

**Supplementary Material (ESI) for RSC Advances.**

**Immobilization of Palladium Catalyst on Magnetically  
Separable Polyurea Nanosupport**

Suzana Natour and Raed Abu-Reziq\*<sup>a</sup>

Institute of Chemistry, Casali Center of Applied Chemistry and Center for Nanoscience and  
Nanotechnology, the Hebrew University of Jerusalem, Jerusalem 91904, Israel.

Fax: +972-2-6585469, E-mail: [Raed.Abu-Reziq@mail.huji.ac.il](mailto:Raed.Abu-Reziq@mail.huji.ac.il)

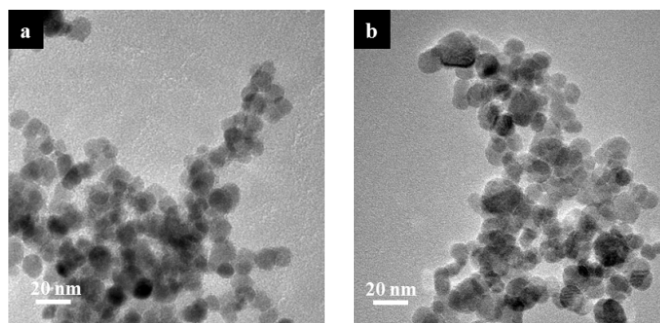

**Fig. S1.** TEM micrograph of a) magnetic nanoparticles and b) MNPs-IL-C<sub>4</sub>.

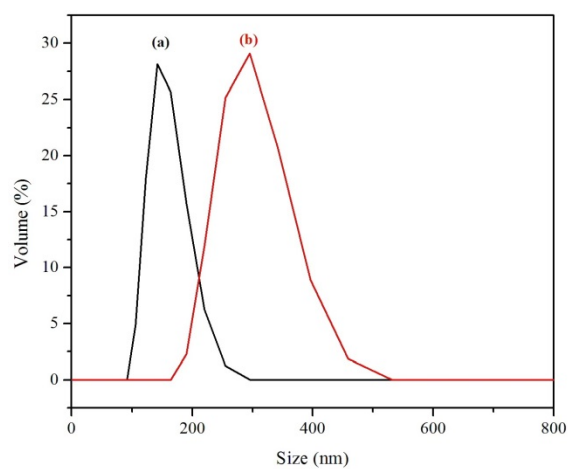

**Fig. S2.** Particle size distribution of a) pure PU NPs and b) MNPs-IL-C<sub>4</sub>@PU NPs.

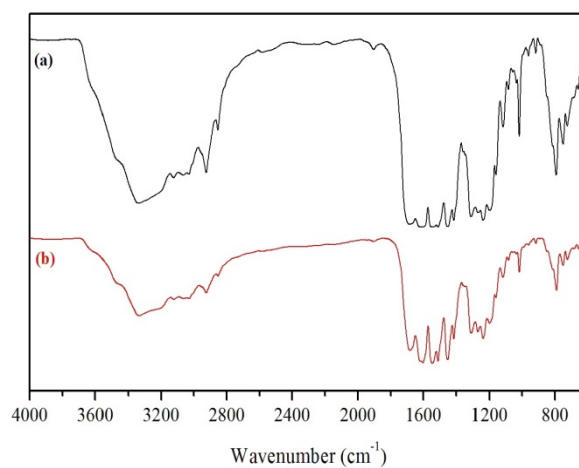

**Fig. S3.** Transmission FTIR spectra of a) pure PU NPs b) MNPs-IL-C<sub>4</sub>@PU NPs.

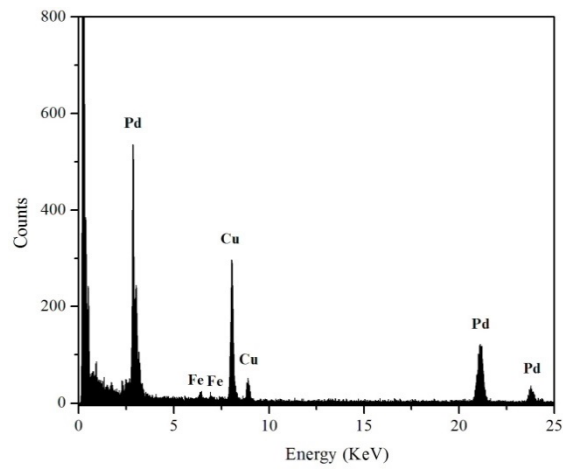

**Fig. S4.** EDS analysis of Pd<sub>ad</sub> on the surface of MNPs-IL-C<sub>4</sub>@PU NPs.

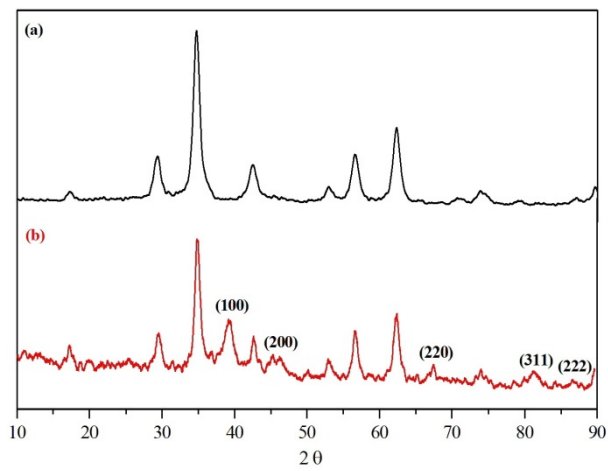

**Fig. S5.** XRD pattern of a) pure magnetite and b) Pd<sub>ad</sub>/MNPs-IL-C<sub>4</sub>@PU NPs.

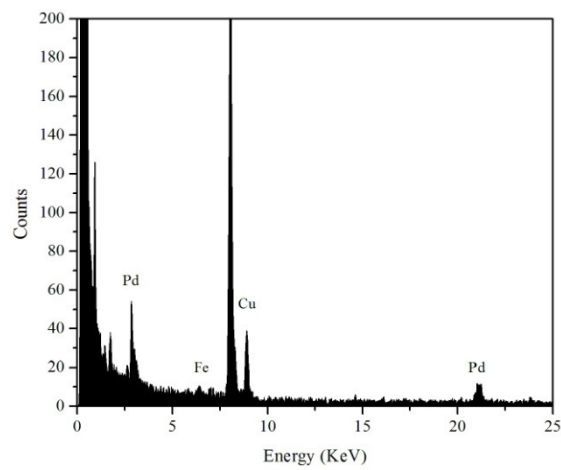

**Fig. S6.** EDS analysis of Pd<sub>en</sub> within the MNPs-IL-C<sub>4</sub>@PU NPs.

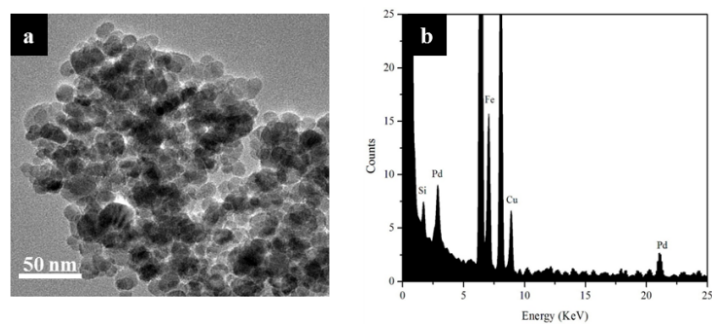

**Fig. S7.** a) TEM and b) EDS of Pd NPs supported on MNPs-IL-C<sub>4</sub>.

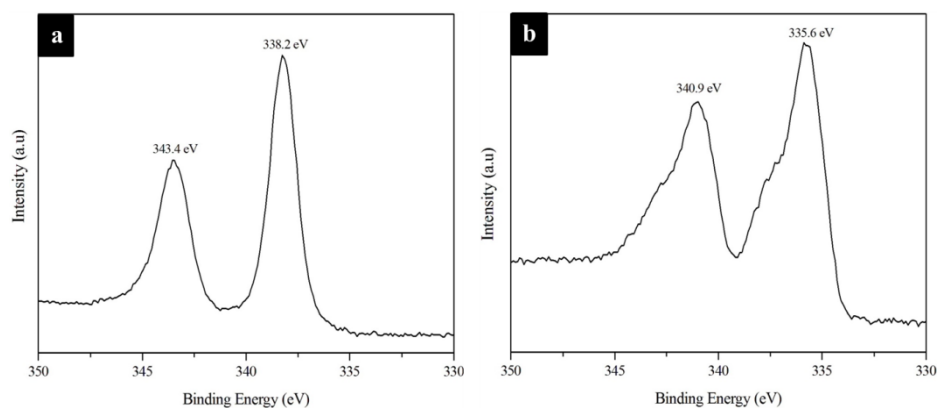

**Fig. S8.** XPS spectrum of the Pd<sub>ad</sub> system a) before and b) after hydrogenation reaction showing Pd 3d<sub>5/2</sub> and Pd 3d<sub>3/2</sub> binding energies.

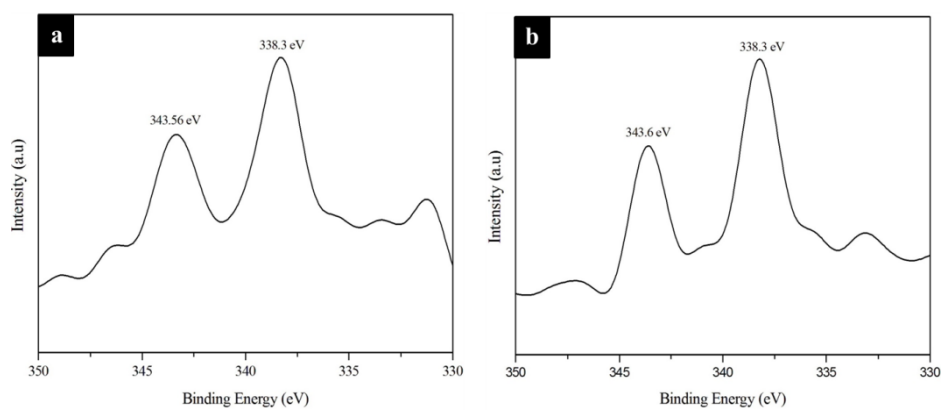

**Fig. S9.** XPS spectrum of the Pd<sub>em</sub> system a) before and b) after hydrogenation reaction showing Pd 3d<sub>5/2</sub> and Pd 3d<sub>3/2</sub> binding energies.

**Table S1.** Hydrogenation reaction of aromatic alkenes catalysed by Pd<sub>ad</sub>/MNPs-IL-C<sub>4</sub>@PU NPs.<sup>a</sup>

| Entry | Substrate                                                                          | Product <sup>b</sup>                                                               | Yield (%) <sup>c</sup> |
|-------|------------------------------------------------------------------------------------|------------------------------------------------------------------------------------|------------------------|
| 1     | 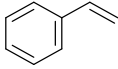  |   | 100                    |
| 2     |   |  | 100                    |
| 3     |   |  | 100                    |
| 4     |   |   | 100                    |
| 5     |   |  | 100                    |
| 6     |  |  | 100                    |

<sup>a</sup>Reaction conditions: 1.1 g of the Pd<sub>ad</sub>/MNPs-IL-C<sub>4</sub>@PU NPs suspension in heptane containing 0.008 mmol of palladium catalyst, 1.6 mmol substrate in 5 mL heptane, 40 psi hydrogen, 2 h at 50 °C. <sup>b</sup> Products were characterized by <sup>1</sup>H-NMR spectroscopy. <sup>c</sup> Yield was determined by <sup>1</sup>H-NMR spectroscopy and GC.

**Table S2.** Hydrogenation reaction of aromatic alkenes catalysed by Pd<sub>en</sub> system.<sup>a</sup>

| Entry | Substrate                                                                          | Product <sup>b</sup>                                                               | Yield (%) <sup>c</sup> |
|-------|------------------------------------------------------------------------------------|------------------------------------------------------------------------------------|------------------------|
| 1     | 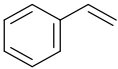  |   | 41 (100) <sup>d</sup>  |
| 2     |   |   | 48(65) <sup>d</sup>    |
| 3     |   |   | 67 (85) <sup>d</sup>   |
| 4     |   |   | 11 (38) <sup>d</sup>   |
| 5     |   |   | 27                     |
| 6     |  |  | 0                      |

<sup>a</sup> Reaction conditions: 1 g of the Pd encapsulated in MNPs-IL-C<sub>4</sub>@PU NPs dispersed in heptane containing 0.008 mmol of palladium catalyst, 1.6 mmol substrate in 5 mL heptane, 40 psi hydrogen, 2 h at 50 °C. <sup>b</sup> Products were characterized by <sup>1</sup>H-NMR spectroscopy. <sup>c</sup> Yield was determined by <sup>1</sup>H-NMR spectroscopy and GC. <sup>d</sup> Yields obtained when the reaction time was prolonged to 6 h.
